# Supplementary material
Source: publisher figshare collection journal article supplement (https://frontiersin.figshare.com/ndownloader/files/21376101)
Supplement: Supplementary file [file 21376101]

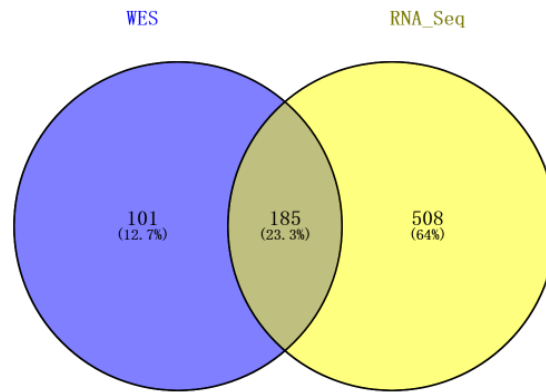

**Figure S1.** Venny plot showing the overlap of patients with exome sequencing and RNA-Seq data.

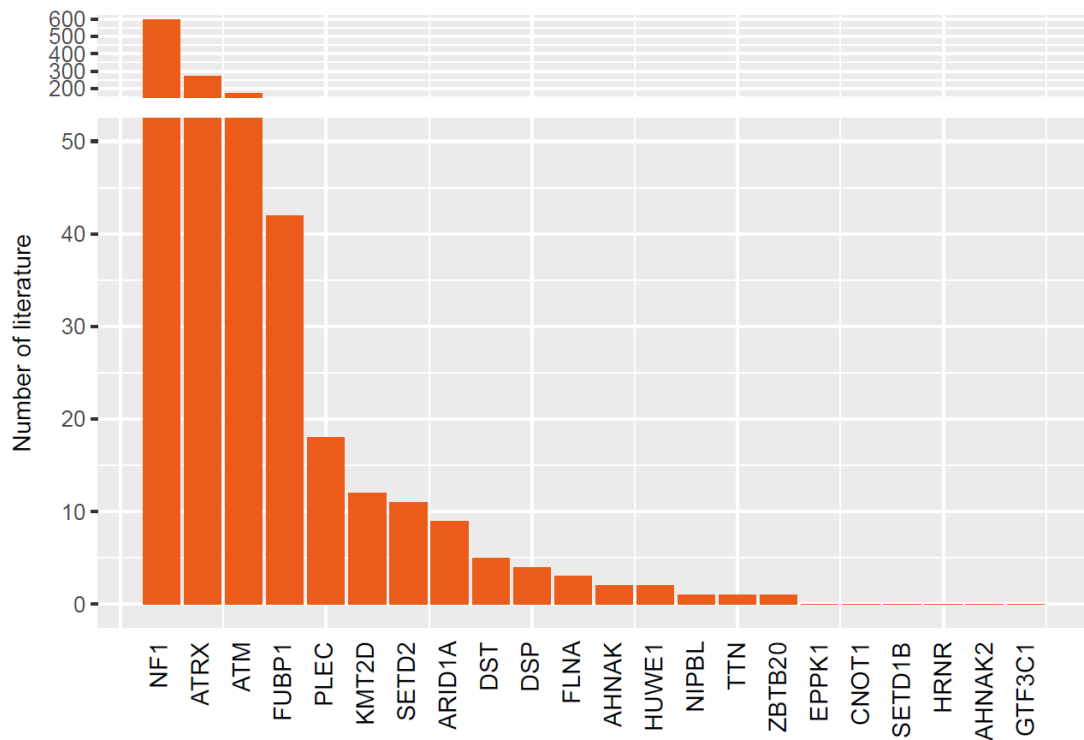

**Figure S2.** The number of literature genes co-occurred with glioma.

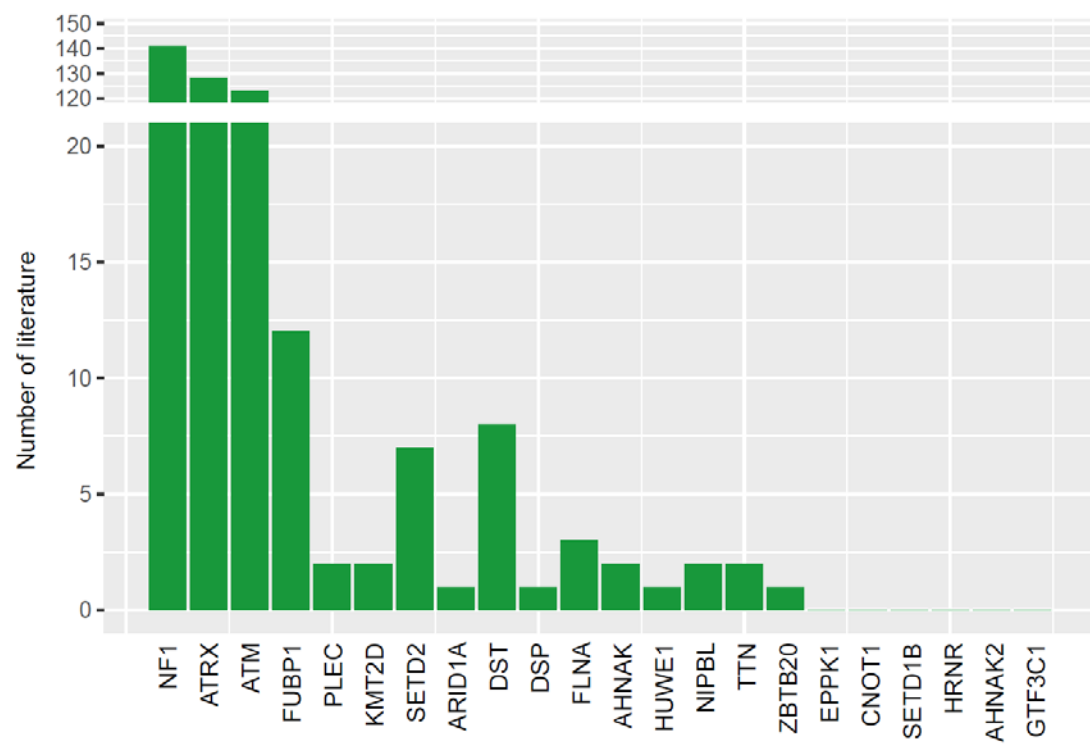

**Figure S3. The number of literature genes co-occurred with glioblastoma.**
